# Supplementary material
Source: HighWire-hosted journal article supplement (https://cmajopen-stage.highwire.org/highwire/filestream/85602/field_highwire_adjunct_files/0/2020-0222-1-at.pdf)
Supplement: 2020-0222-1-at.pdf [file 2020-0222-1-at.pdf]

# **FRAILITY AND PHYSICAL ACTIVITY SEARCH STRATEGIES** **JUNE 2019**

## **MEDLINE 3298**

refs

Database: OVID Medline Epub Ahead of Print, In-Process & Other Non-Indexed Citations,  
Ovid MEDLINE(R) Daily and Ovid MEDLINE(R) 1946 to Present Search Strategy:

```

----- 1
Frail Elderly/ or Frailty/ (10949)
2   frailty.tw. (10731)
3   (frail adj3 (person? or people or elderly or patient? or individual? or adult? or outpatient?)).tw.
    (7141)
4   or/1-3 (20608)
5   exp exercise/ or exercis$.tw. or physical activit$.tw. (422109)
6   physical activity/ or cycling/ or jogging/ or running/ or stretching/ or swimming/ or walking/ or weight
    bearing/ or weight lifting/ (178998)
7   walking/ or swimming/ or exp running/ or tai ji/ or yoga/ (67608)
8   (Walking or jogging or running or Resistance training or strength training or Aerobic training or
    Swimming or aquafit or aquacise or Tai Chi or Yoga or rehabilitation or Balance training or flexibility
    training Standing or Whole-body vibration).tw. (298369)
9   or/5-8 (650135)
10  4 and 9 (3322)
11  animals/ not (animals/ and human/) (4554892) 12   10 not 11 (3298)
  
```

## **EMBASE 5133**

refs

Database: Embase <1974 to 2019 June 10> Search  
Strategy:

```

----- 1
frail elderly/ (9392)
2   frailty/ (6812)
3   (frail adj3 (person? or people or elderly or patient? or individual? or adult? or outpatient?)).tw.
    (10767) 4   frailty.tw. (16350)
5   or/1-4 (28736)
6   exp exercise/ or exercis$.tw. or physical activit$.tw. (554109)
7   physical activity/ or cycling/ or jogging/ or running/ or stretching/ or swimming/ or walking/ or weight
    bearing/ or weight lifting/ (280303)
8   (Walking or jogging or running or Resistance training or strength training or Aerobic training or
    Swimming or aquafit or aquacise or Tai Chi or Yoga or rehabilitation or Balance training or flexibility
    training Standing or Whole-body vibration).tw. (397805)
9   yoga/ (6638)
10  Tai Chi/ (2653)
11  or/6-10 (947114)
12  5 and 11 (5350)
13  limit 12 to human (5133)
  
```

## COCHRANE

103 reviews

947 trials

Search Name: Frailty & exercise Date

Run: 11/06/2019 16:24:33

Comment:

| ID  | Search Hits                                                                                                                                                                                                                                                                                                   |
|-----|---------------------------------------------------------------------------------------------------------------------------------------------------------------------------------------------------------------------------------------------------------------------------------------------------------------|
| #1  | MeSH descriptor: [Frailty] explode all trees 29                                                                                                                                                                                                                                                               |
| #2  | MeSH descriptor: [Frail Elderly] explode all trees 659                                                                                                                                                                                                                                                        |
| #3  | frail NEAR/3 (person? or people or elderly or patient? or individual? or adult? or outpatient?) 1907                                                                                                                                                                                                          |
| #4  | frail* 3135                                                                                                                                                                                                                                                                                                   |
| #5  | #1 or #2 or #3 or #4 3135                                                                                                                                                                                                                                                                                     |
| #6  | MeSH descriptor: [Exercise Therapy] explode all trees 11989                                                                                                                                                                                                                                                   |
| #7  | MeSH descriptor: [Exercise] explode all trees 21923                                                                                                                                                                                                                                                           |
| #8  | MeSH descriptor: [Walking] explode all trees 5132                                                                                                                                                                                                                                                             |
| #9  | MeSH descriptor: [Running] explode all trees 1872                                                                                                                                                                                                                                                             |
| #10 | MeSH descriptor: [Yoga] this term only 583                                                                                                                                                                                                                                                                    |
| #11 | MeSH descriptor: [Tai Ji] this term only 312                                                                                                                                                                                                                                                                  |
| #12 | Walking or jogging or running or Resistance training or strength training or Aerobic training or Swimming or aquafit or aquacise or Tai Chi or Yoga or rehabilitation or Balance training or flexibility training Standing or Whole-body vibration 90631 #13 #6 or #7 or #8 or #9 or #10 or #11 or #12 102188 |
| #14 | #5 and #13 1073                                                                                                                                                                                                                                                                                               |

## CINAHL

1596 refs

S12 S4 AND S11 S11 S5 OR S6 OR S7 OR S8 OR S9

OR S10

S10 (MH "Tai Chi")

S9 (MH "Yoga")

S8 TI ( Walking or jogging or running or Resistance training or strength training or Aerobic training or Swimming or aquafit or aquacise or Tai Chi or Yoga or rehabilitation or Balance training or flexibility training Standing or Whole-body vibration ) OR AB ( Walking or jogging or running or Resistance training or strength training or Aerobic training or Swimming or aquafit or aquacise or Tai Chi or Yoga or rehabilitation or Balance training or flexibility training Standing or Whole-body vibration ...  
S7 TI physical activit\* OR AB physical activit\*

S6 TI exercis\* OR AB exercis\*  
S5 (MH "Exercise+")  
S4 S1 OR S2 OR S3  
S3 TI ( frail N3 (person# or people  
or elderly or patient# or individual#  
or adult# or outpatient#) ) OR AB (   
frail N3 (person# or people or  
elderly or patient# or individual# or  
adult# or outpatient#) )  
S2 (MH "Frail Elderly")  
S1 (MH "Frailty Syndrome")
